# Supplementary material for: Bowel Dysfunction After Colon Cancer Surgery: A Prospective, Longitudinal, Multicenter Study
Source: PubMed Central journal article supplement (PMC11373893; doi:10.1097/dcr.0000000000003358), 2024-06-20
Supplement: dcr-67-1322-s002.pdf [file dcr-67-1322-s002.pdf]

**Supplement Table 1. Comparison responders versus non-responders.**

| Variable                      | Responders<br>N = 1,221 | Non-responders<br>N = 324 | p value        |
|-------------------------------|-------------------------|---------------------------|----------------|
| Sex                           |                         |                           | 0.4            |
| <i>Men</i>                    | 629 (52)                | 159 (49)                  |                |
| <i>Women</i>                  | 592 (48)                | 165 (51)                  |                |
| Age (years)                   | 72.0 (65.0 - 78.0)      | 76.0 (69.0 - 81.0)        | < <b>0.001</b> |
| BMI (kg/m <sup>2</sup> )**    | 25.7 (23.5 - 28.7)      | 25.8 (23.4 - 29.7)        | 0.5            |
| <i>Missing</i>                | 11 (1)                  | 2 (1)                     |                |
| ASA***                        |                         |                           | < <b>0.001</b> |
| <i>I</i>                      | 161 (14)                | 24 (7.7)                  |                |
| <i>II</i>                     | 731 (62)                | 163 (52)                  |                |
| <i>III</i>                    | 282 (24)                | 112 (36)                  |                |
| <i>IV</i>                     | 13 (1.1)                | 14 (4.5)                  |                |
| <i>Missing</i>                | 34 (3)                  | 11 (3)                    |                |
| Tumor stage (UICC)****        |                         |                           | 0.2            |
| <i>I</i>                      | 264 (26)                | 66 (25)                   |                |
| <i>II</i>                     | 250 (24)                | 60 (22)                   |                |
| <i>III</i>                    | 441 (43)                | 114 (42)                  |                |
| <i>IV</i>                     | 70 (6.8)                | 29 (11)                   |                |
| <i>Missing</i>                | 196 (16)                | 55 (17)                   |                |
| Neoadjuvant chemotherapy      | 18 (1.5)                | 6 (1.9)                   | 0.6            |
| <i>Missing</i>                | 1 (0)                   | 2 (1)                     |                |
| Minimally invasive surgery    | 548 (45)                | 115 (35)                  | <b>0.002</b>   |
| <i>Missing</i>                | 1 (0)                   |                           |                |
| Setting                       |                         |                           | <b>0.008</b>   |
| <i>Elective</i>               | 1,217 (100)             | 318 (98)                  |                |
| <i>Emergency</i>              | 4 (0.3)                 | 6 (1.9)                   |                |
| Temporary stoma               | 31 (2.5)                | 13 (4.0)                  | 0.2            |
| <i>Missing</i>                | 1                       | 1                         |                |
| Planned adjuvant chemotherapy | 123 (37)                | 28 (28)                   | 0.11           |
| <i>Missing</i>                | 888 (73)                | 225 (69)                  |                |

\*n (%); Median (IQR)

\*\*BMI = Body Mass Index

\*\*\*ASA = The American Society of Anesthesiologists (ASA) physical status classification

\*\*\*\*UICC = The Union for International Cancer Control (UICC)
