# Supplementary material for: Bowel Dysfunction After Colon Cancer Surgery: A Prospective, Longitudinal, Multicenter Study
Source: PubMed Central journal article supplement (PMC11373893; doi:10.1097/dcr.0000000000003358), 2024-06-20
Supplement: dcr-67-1322-s003.pdf [file dcr-67-1322-s003.pdf]

**Supplemental Table 2. Prevalence of symptoms of bowel dysfunction total**

| Variable                        | 1 year                    |                          |                  | 3 years                   |                          |                  |
|---------------------------------|---------------------------|--------------------------|------------------|---------------------------|--------------------------|------------------|
|                                 | Right-sided resection (%) | Left-sided resection (%) | p                | Right-sided resection (%) | Left-sided resection (%) | p                |
| Incontinence for flatus         | 24.3 (21.1-27.6)          | 30.1 (26.4-35.3)         | <b>0.022</b>     | 19.7 (16.5-23.0)          | 23.9 (19.7-28.1)         | 0.139            |
| Incontinence for stools         | 7.5 (5.5-9.4)             | <u>5.5</u> (3.3-7.6)     | 0.238            | 5.5 (3.7-7.4)             | 5.4 (3.1-7.6)            | 1                |
| High frequency (>4/day)         | 7.4 (5.4-9.4)             | 10.0 (7.2-12.9)          | 0.158            | 7.0(4.9-9.1)              | 6.5 (4.0-9.0)            | 0.856            |
| Low frequency (<1/day)          | 25.0 (21.7-28.3)          | 22.2 (18.2-26.2)         | 0.325            | 26.2 (22.6-29.7)          | 30.6 (26.0-35.3)         | 0.146            |
| Clustering                      | 18.3 (15.4-21.2)          | 19.2 (15.5-23.0)         | 0.745            | 16.6 (13.6-19.6)          | 17.9 (14.1-21.6)         | 0.664            |
| Urgency                         | 16.5 (13.7-19.3)          | 11.0 (8.0-14.0)          | <b>0.014</b>     | 15.4 (12.5-18.3)          | 11.0 (7.9-14.1)          | 0.058            |
| Loose stools                    | 32.0 (28.5-35.5)          | 19.9 (16.1-23.7)         | <b>&lt;0.001</b> | 30.8 (27.1-34.5)          | 20.2 (16.2-24.1)         | <b>&lt;0.001</b> |
| Use of antidiarrheal medication | 14.7 (12.2-17.4)          | 10.9 (7.9-13.9)          | 0.084            | 15.2 (12.3-18.1)          | 10.4 (7.4-13.4)          | <b>0.037</b>     |
| Use of laxatives                | 11.6 (9.2-14.0)           | 21.4 (17.5-25.3)         | <b>&lt;0.001</b> | 14.3 (11.5-17.1)          | 20.8 (16.8-24.8)         | <b>0.001</b>     |

**Prevalence of symptoms of bowel dysfunction grouped by sex**

|                                 | 1 year follow-up          |       |                  |                          |       |              | 3 years follow-up         |       |                  |                          |       |              |
|---------------------------------|---------------------------|-------|------------------|--------------------------|-------|--------------|---------------------------|-------|------------------|--------------------------|-------|--------------|
|                                 | Right-sided resection (%) |       |                  | Left-sided resection (%) |       |              | Right-sided resection (%) |       |                  | Left-sided resection (%) |       |              |
|                                 | Men                       | Women | p                | Men                      | Women | p            | Men                       | Women | p                | Men                      | Women | p            |
| Incontinence for flatus         | 19.5                      | 28.9  | <b>0.006</b>     | 27.1                     | 35.7  | 0.075        | 15.7                      | 23.5  | <b>0.023</b>     | 17.8                     | 31.2  | <b>0.003</b> |
| Incontinence for stools         | 7.5                       | 7.4   | 1.000            | 4.6                      | 6.6   | 0.494        | 5.0                       | 6.0   | 0.730            | 2.8                      | 8.5   | <b>0.023</b> |
| High frequency (>4/day)         | 7.6                       | 7.2   | 0.944            | 10.9                     | 8.8   | 0.589        | 7.9                       | 6.2   | 0.543            | 7.5                      | 5.3   | 0.504        |
| Low frequency (<1/day)          | 25.6                      | 24.4  | 0.790            | 21.8                     | 22.7  | 0.938        | 27.9                      | 24.6  | 0.421            | 30.8                     | 30.4  | 1.000        |
| Clustering                      | 14.2                      | 22.1  | <b>0.011</b>     | 15.8                     | 23.8  | 0.055        | 12.0                      | 20.8  | <b>0.006</b>     | 14.0                     | 22.6  | <b>0.037</b> |
| Urgency                         | 11.4                      | 21.4  | <b>&lt;0.001</b> | 6.7                      | 16.7  | <b>0.002</b> | 9.6                       | 20.8  | <b>&lt;0.001</b> | 7.9                      | 14.8  | <b>0.044</b> |
| Loose stools                    | 28.4                      | 35.4  | 0.060            | 17.1                     | 23.6  | 0.123        | 28.2                      | 33.2  | 0.215            | 16.9                     | 24.2  | 0.095        |
| Use of antidiarrheal medication | 13.6                      | 15.8  | 0.482            | 9.2                      | 13.2  | 0.248        | 14.8                      | 15.5  | 0.918            | 10.6                     | 10.2  | 1.00         |
| Use of laxatives                | 11.7                      | 11.5  | 1.000            | 16.7                     | 27.5  | <b>0.011</b> | 17.7                      | 11.2  | <b>0.033</b>     | 16.9                     | 25.6  | <b>0.047</b> |
