# Supplementary material for: Bowel Dysfunction After Colon Cancer Surgery: A Prospective, Longitudinal, Multicenter Study
Source: PubMed Central journal article supplement (PMC11373893; doi:10.1097/dcr.0000000000003358), 2024-06-20
Supplement: dcr-67-1322-s004.pdf [file dcr-67-1322-s004.pdf]

Supplement Table 3

To model the prevalence of LARS and distress, a generalized linear repeated measurements model with a logit link was employed to account for the repeated measurements over time.

Major LARS

Fixed effects:

|                                    | Estimate | Std. Error | z value | Pr(> z ) |
|------------------------------------|----------|------------|---------|----------|
| (Intercept)                        | -0.6953  | 2.7481     | -0.253  | 0.8002   |
| time                               | -1.9973  | 1.1463     | -1.742  | 0.0815   |
| Optyp_ny                           | -3.8432  | 2.0044     | -1.917  | 0.0552   |
| sex                                | -1.1373  | 1.6934     | -0.672  | 0.5018   |
| age_groupyounger                   | -7.6763  | 4.7430     | -1.618  | 0.1056   |
| Optyp_ny:sex                       | 2.0474   | 1.2262     | 1.670   | 0.0950   |
| Optyp_ny:age_groupyounger          | 5.0428   | 3.0991     | 1.627   | 0.1037   |
| sex:age_groupyounger               | 4.0803   | 2.7953     | 1.460   | 0.1444   |
| time:Optyp_ny                      | 1.5771   | 0.8178     | 1.929   | 0.0538   |
| time:sex                           | 0.9580   | 0.7054     | 1.358   | 0.1744   |
| time:age_groupyounger              | 2.8266   | 1.9407     | 1.456   | 0.1453   |
| Optyp_ny:sex:age_groupyounger      | -2.4232  | 1.8557     | -1.306  | 0.1916   |
| time:Optyp_ny:sex                  | -0.7368  | 0.5002     | -1.473  | 0.1407   |
| time:Optyp_ny:age_groupyounger     | -1.8335  | 1.2614     | -1.453  | 0.1461   |
| time:sex:age_groupyounger          | -1.3494  | 1.1487     | -1.175  | 0.2401   |
| time:Optyp_ny:sex:age_groupyounger | 0.7093   | 0.7606     | 0.933   | 0.3511   |

Distress related to the bowel function, regardless of LARS score

Fixed effects:

|                                    | Estimate | Std. Error | z value | Pr(> z ) |
|------------------------------------|----------|------------|---------|----------|
| (Intercept)                        | -3.88844 | 2.32960    | -1.669  | 0.0951   |
| time                               | -0.51904 | 1.02791    | -0.505  | 0.6136   |
| Optyp_ny                           | -0.01505 | 1.62356    | -0.009  | 0.9926   |
| sex                                | 0.30359  | 1.44048    | 0.211   | 0.8331   |
| age_groupyounger                   | 0.36199  | 3.90630    | 0.093   | 0.9262   |
| Optyp_ny:sex                       | 0.37523  | 1.01710    | 0.369   | 0.7122   |
| Optyp_ny:age_groupyounger          | -0.33760 | 2.53912    | -0.133  | 0.8942   |
| sex:age_groupyounger               | 0.16343  | 2.35010    | 0.070   | 0.9446   |
| time:Optyp_ny                      | 0.08297  | 0.72173    | 0.115   | 0.9085   |
| time:sex                           | 0.51119  | 0.62814    | 0.814   | 0.4157   |
| time:age_groupyounger              | -0.11133 | 1.67947    | -0.066  | 0.9471   |
| Optyp_ny:sex:age_groupyounger      | -0.06192 | 1.55926    | -0.040  | 0.9683   |
| time:Optyp_ny:sex                  | -0.21964 | 0.44380    | -0.495  | 0.6207   |
| time:Optyp_ny:age_groupyounger     | 0.39298  | 1.09267    | 0.360   | 0.7191   |
| time:sex:age_groupyounger          | -0.03135 | 1.00096    | -0.031  | 0.9750   |
| time:Optyp_ny:sex:age_groupyounger | -0.15601 | 0.66523    | -0.235  | 0.8146   |
