# Supplementary material for: Bowel Dysfunction After Colon Cancer Surgery: A Prospective, Longitudinal, Multicenter Study
Source: PubMed Central journal article supplement (PMC11373893; doi:10.1097/dcr.0000000000003358), 2024-06-20
Supplement: dcr-67-1322-s005.pdf [file dcr-67-1322-s005.pdf]

**Supplemental Table 4. Association between specific symptoms and distress**

| Predictor               | Association with distress |               |                  | Change of association over time |              |                |
|-------------------------|---------------------------|---------------|------------------|---------------------------------|--------------|----------------|
|                         | OR                        | 95% CI        | <i>p</i> value   | OR                              | 95% CI       | <i>p</i> value |
| Incontinence for flatus | 4.75                      | (2.04, 11.03) | <b>&lt;0.001</b> | 0.84                            | (0.57, 1.24) | 0.38           |
| Incontinence for stools | 5.38                      | (1.28, 22.64) | <b>0.022</b>     | 1.11                            | 0.58, 2.14)  | 0.75           |
| High frequency (>4/day) | 1.94                      | (0.52, 7.22)  | 0.32             | 1.27                            | (0.69, 2.34) | 0.44           |
| Low frequency (<1/day)  | 1.19                      | (0.43, 3.25)  | 0.74             | 1.16                            | (0.75, 1.79) | 0.50           |
| Clustering of stools    | 4.78                      | (1.61, 14.25) | <b>0.004</b>     | 0.54                            | (0.33, 0.91) | <b>0.02</b>    |
| Urgency                 | 2.23                      | (0.72, 6.87)  | 0.12             | 1.47                            | (0.88, 2.46) | 0.14           |
| Loose stools            | 7.00                      | (2.72, 18.04) | <b>&lt;0.001</b> | 0.67                            | (0.44, 1.02) | 0.06           |
